# Supplementary material for: Different charge-storage mechanisms in disulfide vanadium and vanadium carbide monolayer
Source: Royal Society of Chemistry journal article supplement (doi:10.1039/c5ta01003a), 2015-01-01
Supplement: c5ta01003a1.pdf [file c5ta01003a1.pdf]

## **Different charge-storage mechanisms in Disulfide Vanadium and Vanadium Carbide Monolayer**

Xiao Ji,<sup>a</sup> Kui Xu,<sup>a</sup> Chi Chen,<sup>a</sup> Bao Zhang,<sup>a</sup> Houzhao Wan,<sup>a</sup> Yunjun Ruan,<sup>a</sup> Ling Miao<sup>a</sup>  
and Jianjun Jiang<sup>\*a</sup>

### **Supporting Information**

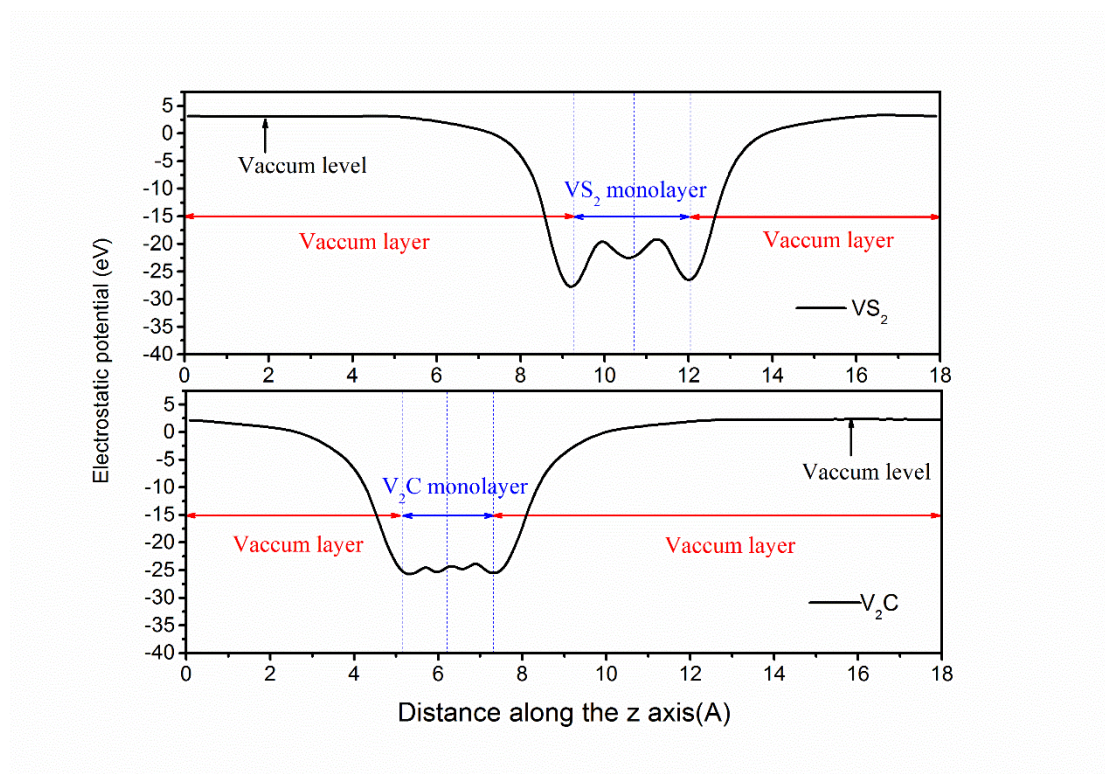

Figure S 1 Electrostatic potential energy of  $\text{VS}_2$  and  $\text{V}_2\text{C}$  monolayer along the  $z$  axis.

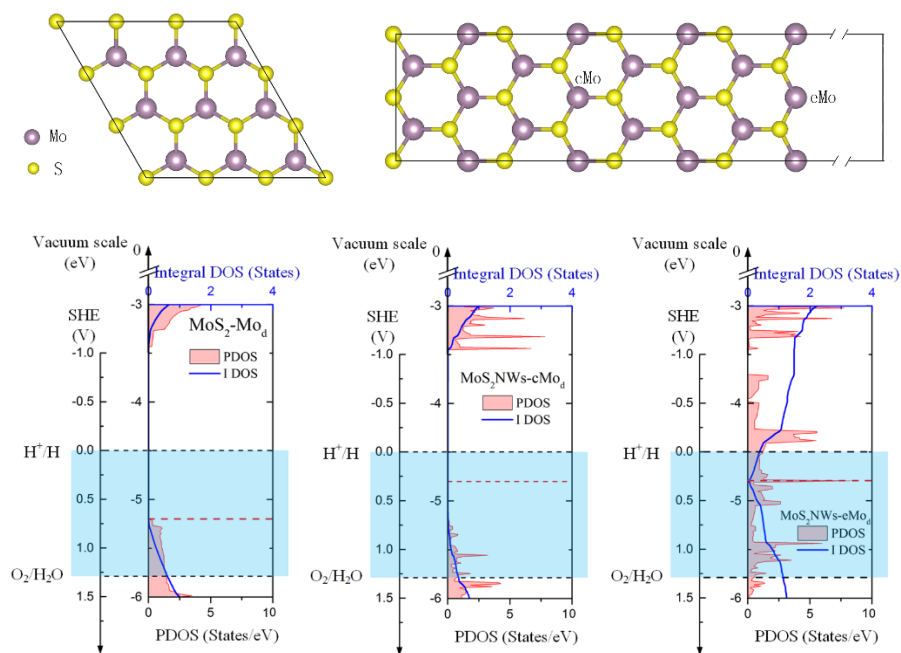

Figure S 2 A schematic showing the structure of  $\text{MoS}_2$ ,  $\text{MoS}_2$  nanoribbon and their relative dispositions of PDOS and Integral DOS of  $d$ -orbits of Mo atoms in  $\text{MoS}_2$  monolayers, inside  $\text{MoS}_2$  nanoribbon, and edge  $\text{MoS}_2$  nanoribbon shown both on the vacuum scale and with respect to the SHE reference. The dash red lines indicate the Fermi level positions of  $\text{VS}_2$  monolayer. The light blue region represents the electrolyte window.
